# Supplementary material for: Infrapatellar Fat Pad Modulates Osteoarthritis-Associated Cytokine and MMP Expression in Human Articular Chondrocytes
Source: MDPI journal article supplement (doi:10.3390/cells12242850), 2023-12-15
Supplement: s1 [file s1]

Array C6 single values n=4 per group

|                      | FP CO1 | FP CO2 | FP CO3 | FP CO4 | FP OA1 | FP OA2 | FP OA3 | FP OA4 |
|----------------------|--------|--------|--------|--------|--------|--------|--------|--------|
| Angiogenin           | 1.097  | 0.869  | 1.149  | 1.139  | 1.923  | 1.137  | 1.247  | 1.372  |
| Leptin               | 0.150  | 0.675  | 0.196  | 0.518  | 0.209  | 1.274  | 0.632  | 0.562  |
| RANTES (CCL5)        | 0.333  | 0.279  | 0.209  | 0.497  | 0.061  | 1.480  | 0.681  | 0.351  |
| FGF-6                | 0.388  | 0.247  | 0.488  | 0.606  | 0.566  | 0.542  | 0.089  | 0.535  |
| LIGHT (TNFSF14)      | 0.144  | 0.467  | 0      | 0.458  | 0.280  | 1.088  | 0.484  | 0.390  |
| MCP-1 (CCL2)         | 0.372  | 0.258  | 0      | 0.439  | 0.368  | 0.890  | 0.424  | 0.282  |
| SDF1a (CXCL12)       | 0      | 0.122  | 0.086  | 0.518  | 0.219  | 1.162  | 0.554  | 0.167  |
| SCF                  | 0      | 0.074  | 0.074  | 0.463  | 0.134  | 1.192  | 0.574  | 0.172  |
| PDGF-BB              | 0.179  | 0.155  | 0      | 0.344  | 0      | 1.094  | 0.458  | 0.240  |
| Eotaxin-2 (CCL24)    | 0.301  | 0.323  | 0.434  | 0.322  | 0.199  | 0.318  | 0      | 0.402  |
| TARC (CCL17)         | 0      | 0.045  | 0.035  | 0.487  | 0.218  | 0.890  | 0.475  | 0.137  |
| NAP-2 (CXCL7)        | 0.757  | 0      | 0      | 0.124  | 0.383  | 0.226  | 0      | 0.190  |
| IGF-1                | 0      | 0.492  | 0      | 0.274  | 0.085  | 0.391  | 0      | 0.252  |
| Eotaxin-1 (CCL11)    | 0.175  | 0      | 0      | 0.586  | 0.260  | 0      | 0      | 0.343  |
| NT-3                 | 0.058  | 0      | 0      | 0.293  | 0.465  | 0.318  | 0      | 0.220  |
| MCP-2 (CCL8)         | 0.034  | 0.049  | 0      | 0.270  | 0.266  | 0.458  | 0.210  | 0      |
| BDNF                 | 0      | 0      | 0.291  | 0.279  | 0.194  | 0.185  | 0.081  | 0.230  |
| Eotxin-2 (CCL26)     | 0.230  | 0      | 0.141  | 0.255  | 0.181  | 0.200  | 0      | 0.228  |
| IL-1 ra (IL-1 F3)    | 0      | 0      | 0      | 0.331  | 0.529  | 0.326  | 0      | 0      |
| CNTF                 | 0      | 0      | 0.253  | 0.337  | 0.125  | 0.088  | 0      | 0.379  |
| TGF beta 3           | 0      | 0      | 0      | 0.241  | 0.142  | 0.377  | 0.248  | 0.037  |
| TNF alpha            | 0      | 0      | 0      | 0.255  | 0.185  | 0.299  | 0.210  | 0.052  |
| PARC (CCL18)         | 0      | 0      | 0      | 0.341  | 0.427  | 0.222  | 0      | 0      |
| TNF beta             | 0      | 0      | 0      | 0.257  | 0.240  | 0.243  | 0.143  | 0.077  |
| IL-15                | 0      | 0      | 0      | 0.358  | 0.362  | 0.179  | 0      | 0      |
| EGF                  | 0      | 0      | 0.053  | 0.365  | 0.168  | 0      | 0      | 0.274  |
| TGF beta 1           | 0      | 0      | 0      | 0.164  | 0.049  | 0.397  | 0.212  | 0      |
| M-CSF                | 0.048  | 0      | 0      | 0.259  | 0.315  | 0.173  | 0      | 0      |
| Ck beta 8-1 (CCL23)  | 0      | 0      | 0.198  | 0.191  | 0.043  | 0.047  | 0      | 0.294  |
| IGFBP-4              | 0      | 0      | 0      | 0.290  | 0.287  | 0      | 0      | 0.152  |
| MCP-3 (MARC/CCL7)    | 0      | 0      | 0      | 0.172  | 0.203  | 0.224  | 0.085  | 0      |
| BMP-4                | 0      | 0      | 0.149  | 0.171  | 0.057  | 0.055  | 0      | 0.224  |
| IL-1 beta (IL-1F2)   | 0      | 0      | 0      | 0.198  | 0.325  | 0.132  | 0      | 0      |
| MCP-4 (CCL13)        | 0      | 0      | 0      | 0.208  | 0.234  | 0.156  | 0.039  | 0      |
| IGFBP-2              | 0      | 0      | 0      | 0.180  | 0.227  | 0      | 0      | 0.213  |
| FGF-7 (KGF)          | 0      | 0      | 0      | 0.284  | 0.201  | 0.128  | 0      | 0      |
| Fractalkine (CX3CL1) | 0      | 0      | 0      | 0.264  | 0.236  | 0.092  | 0      | 0      |
| GDNF                 | 0      | 0      | 0      | 0.191  | 0.259  | 0.079  | 0      | 0      |
| Flt-3 Ligand         | 0      | 0      | 0      | 0.241  | 0.189  | 0.084  | 0      | 0      |
| IFN-gamma            | 0      | 0      | 0      | 0.090  | 0.223  | 0.070  | 0      | 0.101  |
| IL-16                | 0      | 0      | 0      | 0.168  | 0.255  | 0.045  | 0      | 0      |
| MDC (CCL22)          | 0      | 0      | 0      | 0.129  | 0.230  | 0.102  | 0      | 0      |
| BLC (CXCL13)         | 0      | 0      | 0      | 0.203  | 0.073  | 0.065  | 0      | 0.113  |
| GCP-2 (CXCL6)        | 0      | 0      | 0      | 0.186  | 0.190  | 0.057  | 0      | 0      |
| IL-1 alpha (IL-1F1)  | 0      | 0      | 0      | 0.120  | 0.222  | 0.054  | 0      | 0      |
| IL-13                | 0      | 0      | 0      | 0.115  | 0.102  | 0.085  | 0      | 0      |
| IL-10                | 0      | 0      | 0      | 0.087  | 0.059  | 0.139  | 0      | 0      |
| IL-3                 | 0      | 0      | 0      | 0      | 0.210  | 0.053  | 0      | 0      |
| MIG (CXCL9)          | 0      | 0      | 0      | 0      | 0.149  | 0.090  | 0      | 0      |
| MIP3 alpha (CCL20)   | 0      | 0      | 0      | 0      | 0.155  | 0.077  | 0      | 0      |
| IL-2                 | 0      | 0      | 0      | 0      | 0.176  | 0.055  | 0      | 0      |
| IL-4                 | 0      | 0      | 0      | 0      | 0.155  | 0.035  | 0      | 0      |
| IGFBP-1              | 0      | 0      | 0      | 0.041  | 0.103  | 0      | 0      | 0.040  |
| MIP-1 delta (CCL15)  | 0      | 0      | 0      | 0      | 0.118  | 0.066  | 0      | 0      |
| IL-7                 | 0      | 0      | 0      | 0.103  | 0.078  | 0      | 0      | 0      |
| BMP-6                | 0      | 0      | 0      | 0.037  | 0      | 0      | 0      | 0.130  |
| IL-5                 | 0      | 0      | 0      | 0      | 0.113  | 0      | 0      | 0      |
| I-309 (CCL1)         | 0      | 0      | 0      | 0      | 0.094  | 0      | 0      | 0      |
| GM-CSF               | 0      | 0      | 0      | 0      | 0.089  | 0      | 0      | 0      |
| IL-6                 | 0      | 0      | 0      | 0      | 0.088  | 0      | 0      | 0      |

increasing optical density

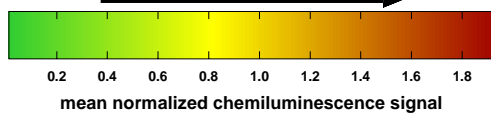

|                       | FP CO1 | FP CO2 | FP CO3 | FP CO4 | FP OA1 | FP OA2 | FP OA3 | FP OA4 |
|-----------------------|--------|--------|--------|--------|--------|--------|--------|--------|
| Adiponectin (ACRP 30) |        | 1.741  | 3.164  | 1.891  | 2.999  | 3.331  | 2.882  | 2.679  |
| TIMP-2                |        | 0.711  | 3.364  | 1.596  | 2.085  | 1.783  | 2.065  | 2.382  |
| MIF                   |        | 0.038  | 1.576  | 0.802  | 0.671  | 0.563  | 0      | 1.135  |
| TIMP-1                |        | 0      | 1.932  | 0.316  | 0.616  | 0.720  | 0.074  | 1.010  |
| ICAM-1 (CD54)         |        | 0.599  | 1.595  | 0.634  | 0.329  | 0.504  | 0.038  | 0.739  |
| OSM                   |        | 0.060  | 1.227  | 0.512  | 0.999  | 0.907  | 0      | 0.381  |
| TECK (CCL25)          |        | 0      | 1.782  | 0.291  | 0.202  | 1.086  | 0      | 0.518  |
| EGFR                  |        | 0.470  | 1.001  | 0.776  | 0.470  | 0.453  | 0      | 0.680  |
| TRAIL R3 (TNFRSF10C)  |        | 0      | 0.915  | 0.397  | 0.770  | 0.751  | 0      | 0.496  |
| IGFBP-6               |        | 0      | 0.346  | 0.325  | 0.640  | 0.072  | 0      | 1.584  |
| MIP-1 alpha (CCL3)    |        | 0      | 1.066  | 0.445  | 0.512  | 0.399  | 0      | 0.490  |
| TNF RI (TNFRSF1A)     |        | 0.265  | 0.762  | 0.134  | 0.882  | 0.552  | 0      | 0.235  |
| gp130                 |        | 0      | 0.827  | 0.224  | 0.787  | 0.702  | 0      | 0.135  |
| I-TAC (CXCL11)        |        | 0.291  | 0.467  | 0.618  | 0.123  | 0.785  | 0      | 0.272  |
| TPO                   |        | 0      | 0.998  | 0.303  | 0.548  | 0.393  | 0      | 0.289  |
| MIP-1 beta (CCL14)    |        | 0      | 0.887  | 0.358  | 0.602  | 0.274  | 0      | 0.274  |
| TNF RII (TNFRSF1B)    |        | 0      | 0.903  | 0.140  | 0.678  | 0.555  | 0      | 0.081  |
| TRAIL R4 (TNFRSF10D)  |        | 0      | 0.635  | 0.280  | 0.641  | 0.445  | 0      | 0.193  |
| uPAR                  |        | 0      | 0.792  | 0.251  | 0.627  | 0.310  | 0      | 0.197  |
| CTACK (CCL27)         |        | 0.582  | 0.323  | 0.531  | 0      | 0.217  | 0      | 0.350  |
| IL-6 R                |        | 0      | 0.481  | 0.153  | 0.641  | 0.719  | 0      | 0      |
| PLGF                  |        | 0      | 0.762  | 0.179  | 0.588  | 0.381  | 0      | 0      |
| IGFBP-3               |        | 0.116  | 0.481  | 0.363  | 0.261  | 0.224  | 0      | 0.364  |
| HCC-4 (CCL16)         |        | 0      | 0.097  | 0.090  | 0.602  | 0.899  | 0      | 0      |
| VEGF-A                |        | 0      | 0.626  | 0.229  | 0.544  | 0.237  | 0      | 0      |
| Lymphotaktin          |        | 0      | 1.090  | 0.302  | 0.172  | 0      | 0      | 0.031  |
| MSP alpha/beta        |        | 0      | 0.739  | 0.281  | 0.512  | 0.044  | 0      | 0      |
| NT-4                  |        | 0      | 0.785  | 0.286  | 0.478  | 0      | 0      | 0      |
| Dtk                   |        | 0.388  | 0.479  | 0.320  | 0.116  | 0      | 0      | 0.235  |
| VEGF-D                |        | 0      | 0.521  | 0.237  | 0.448  | 0.322  | 0      | 0      |
| MIP3 beta (CCL19)     |        | 0      | 0.702  | 0.234  | 0.476  | 0      | 0      | 0      |
| OPG (TNFRSF11B)       |        | 0      | 0.797  | 0.197  | 0.412  | 0      | 0      | 0      |
| CCL28 (MEC)           |        | 0      | 0      | 0.099  | 0.235  | 1.033  | 0      | 0      |
| IL-2 R alpha          |        | 0      | 0.471  | 0.049  | 0.419  | 0.356  | 0      | 0      |
| FGF-9                 |        | 0      | 0.125  | 0.253  | 0.480  | 0.346  | 0      | 0.061  |
| Fas (Apo-1)           |        | 0      | 0.303  | 0.321  | 0.266  | 0.217  | 0      | 0      |
| IGF-1R                |        | 0      | 0.371  | 0.238  | 0.287  | 0      | 0      | 0.053  |
| ENA-78 (CXCL5)        |        | 0.042  | 0.250  | 0.291  | 0.197  | 0.097  | 0      | 0      |
| HGF                   |        | 0      | 0      | 0      | 0.280  | 0.582  | 0      | 0      |
| IL-1 R4 (ST2)         |        | 0      | 0.341  | 0.205  | 0.290  | 0      | 0      | 0      |
| AR                    |        | 0      | 0      | 0.075  | 0.286  | 0.470  | 0      | 0      |
| IL-17A                |        | 0      | 0.415  | 0      | 0.340  | 0.057  | 0      | 0      |
| ANGPT2                |        | 0      | 0.246  | 0.053  | 0.329  | 0.179  | 0      | 0      |
| GRO alpha (CXCL1)     |        | 0      | 0.096  | 0      | 0.408  | 0.270  | 0      | 0      |
| Axl                   |        | 0      | 0      | 0.113  | 0.293  | 0.358  | 0      | 0      |
| FGF-4                 |        | 0      | 0.124  | 0.226  | 0.280  | 0.130  | 0      | 0      |
| BTC                   |        | 0      | 0      | 0      | 0.179  | 0.575  | 0      | 0      |
| IL-12 p70             |        | 0      | 0.431  | 0      | 0.323  | 0      | 0      | 0      |
| IL-12 p40             |        | 0      | 0.358  | 0.049  | 0.276  | 0      | 0      | 0      |
| ICAM-3 (CD50)         |        | 0.125  | 0.403  | 0.131  | 0      | 0      | 0      | 0      |
| IL-11                 |        | 0      | 0.328  | 0.076  | 0.245  | 0      | 0      | 0      |
| IL-1 R1               |        | 0      | 0.285  | 0.126  | 0.232  | 0      | 0      | 0      |
| bFGF                  |        | 0      | 0      | 0.078  | 0.280  | 0.196  | 0      | 0      |
| GRO a/b/c             |        | 0      | 0.099  | 0      | 0.343  | 0.061  | 0      | 0      |
| AgRP                  |        | 0      | 0      | 0.083  | 0.218  | 0.145  | 0.034  | 0      |
| GITR Ligand (TNFSF18) |        | 0      | 0.069  | 0.061  | 0.346  | 0      | 0      | 0      |
| IL-8 (CXCL8)          |        | 0      | 0      | 0      | 0.297  | 0.146  | 0      | 0      |
| GITR (TNFRSF18)       |        | 0      | 0.059  | 0      | 0.352  | 0      | 0      | 0      |
| G-CSF                 |        | 0      | 0      | 0      | 0.263  | 0      | 0      | 0      |
| beta-NGF              |        | 0      | 0      | 0      | 0.185  | 0      | 0      | 0      |

Array C7 single values n=3/4 per group

CO1-Donor-Array was not usable for analysis

increasing optical density →

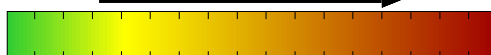

0.2 0.4 0.6 0.8 1.0 1.2 1.4 1.6 1.8 2.0 2.2 2.4 2.6 2.8 3.0 3.2

mean normalized chemiluminescence signal

|                      | Mean FP CO | Mean FP OA |
|----------------------|------------|------------|
| Angiogenin           | 1.064      | 1.420      |
| FGF-6                | 0.432      | 0.433      |
| Leptin               | 0.385      | 0.669      |
| Eotaxin-2 (CCL24)    | 0.345      | 0.230      |
| RANTES (CCL5)        | 0.330      | 0.643      |
| MCP-1 (CCL2)         | 0.267      | 0.491      |
| LIGHT (TNFSF14)      | 0.267      | 0.561      |
| NAP-2 (CXCL7)        | 0.220      | 0.200      |
| IGF-1                | 0.192      | 0.182      |
| Eotaxin-1 (CCL11)    | 0.190      | 0.151      |
| SDF1a (CXCL12)       | 0.181      | 0.525      |
| PDGF-BB              | 0.170      | 0.448      |
| Eotxin-2 (CCL26)     | 0.156      | 0.152      |
| SCF                  | 0.153      | 0.518      |
| CNTF                 | 0.148      | 0.148      |
| BDNF                 | 0.142      | 0.172      |
| TARC (CCL17)         | 0.142      | 0.430      |
| EGF                  | 0.105      | 0.110      |
| Ck beta 8-1 (CCL23)  | 0.097      | 0.096      |
| IL-15                | 0.090      | 0.135      |
| MCP-2 (CCL8)         | 0.088      | 0.233      |
| NT-3                 | 0.088      | 0.251      |
| PARC (CCL18)         | 0.085      | 0.162      |
| IL-1 ra (IL-1 F3)    | 0.083      | 0.214      |
| BMP-4                | 0.080      | 0.084      |
| M-CSF                | 0.077      | 0.122      |
| IGFBP-4              | 0.072      | 0.110      |
| FGF-7 (KGF)          | 0.071      | 0.082      |
| Fractalkine (CX3CL1) | 0.066      | 0.082      |
| TNF beta             | 0.064      | 0.176      |
| TNF alpha            | 0.064      | 0.187      |
| TGF beta 3           | 0.060      | 0.201      |
| Fit-3 Ligand         | 0.060      | 0.068      |
| MCP-4 (CCL13)        | 0.052      | 0.107      |
| BLC (CXCL13)         | 0.051      | 0.063      |
| IL-1 beta (IL-1F2)   | 0.050      | 0.114      |
| GDNF                 | 0.048      | 0.084      |
| GCP-2 (CXCL6)        | 0.046      | 0.062      |
| IGFBP-2              | 0.045      | 0.110      |
| MCP-3 (MARC/CCL7)    | 0.043      | 0.128      |
| IL-16                | 0.042      | 0.075      |
| TGF beta 1           | 0.041      | 0.165      |
| MDC (CCL22)          | 0.032      | 0.083      |
| IL-1 alpha (IL-1F1)  | 0.030      | 0.069      |
| IL-13                | 0.029      | 0.047      |
| IL-7                 | 0.026      | 0.019      |
| IFN-gamma            | 0.022      | 0.099      |
| IL-10                | 0.022      | 0.050      |
| IGFBP-1              | 0.010      | 0.036      |
| BMP-6                | 0.009      | 0.032      |
| IL-3                 | 0          | 0.066      |
| MIG (CXCL9)          | 0          | 0.060      |
| MIP3 alpha (CCL20)   | 0          | 0.058      |
| IL-2                 | 0          | 0.058      |
| IL-4                 | 0          | 0.048      |
| MIP-1 delta (CCL15)  | 0          | 0.046      |
| IL-5                 | 0          | 0.028      |
| I-309 (CCL1)         | 0          | 0.024      |
| GM-CSF               | 0          | 0.022      |
| IL-6                 | 0          | 0.022      |

Array C6 mean values n=4 per group

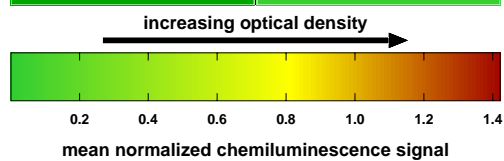

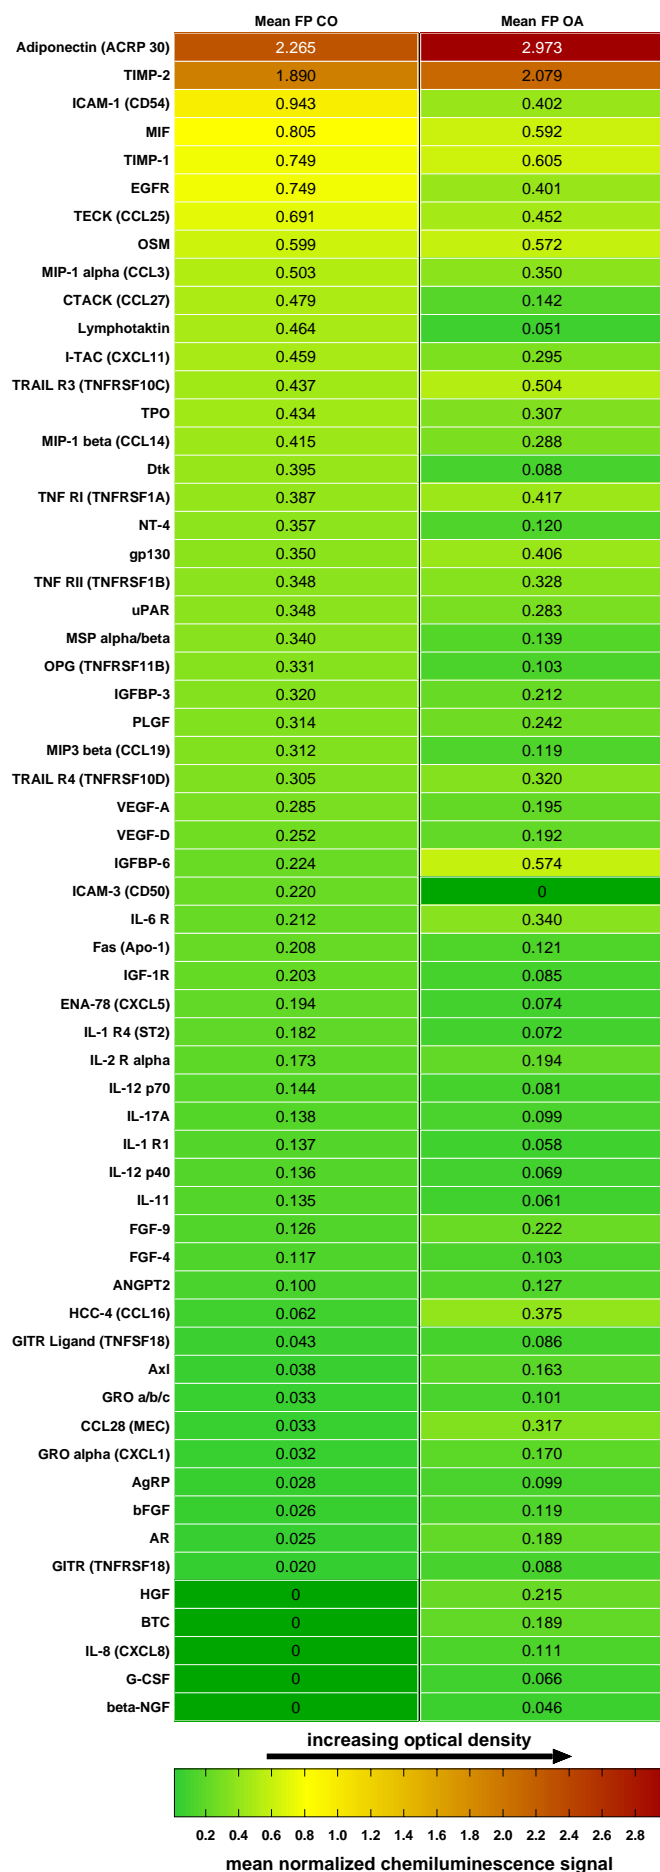

Array C7 mean values n=3/4 per group

CO1-Donor-Array was not usable for analysis

**Figure S1.** Heatmaps for Raybiotech Human Cytokine Array C1000 (consists of C6 and C7 Array and detects 120 Human Cytokines 2x60).
